# Supplementary material for: Nuclear factor one B (NFIB) encodes a subtype-specific tumour suppressor in glioblastoma
Source: PubMed Central journal article supplement (PMC5045397; doi:10.18632/oncotarget.8720), 2016-04-13
Supplement: oncotarget-07-29306-s001.pdf [file oncotarget-07-29306-s001.pdf]

## Nuclear factor one B (NFIB) encodes a subtype-specific tumour suppressor in glioblastoma

### Supplementary Materials

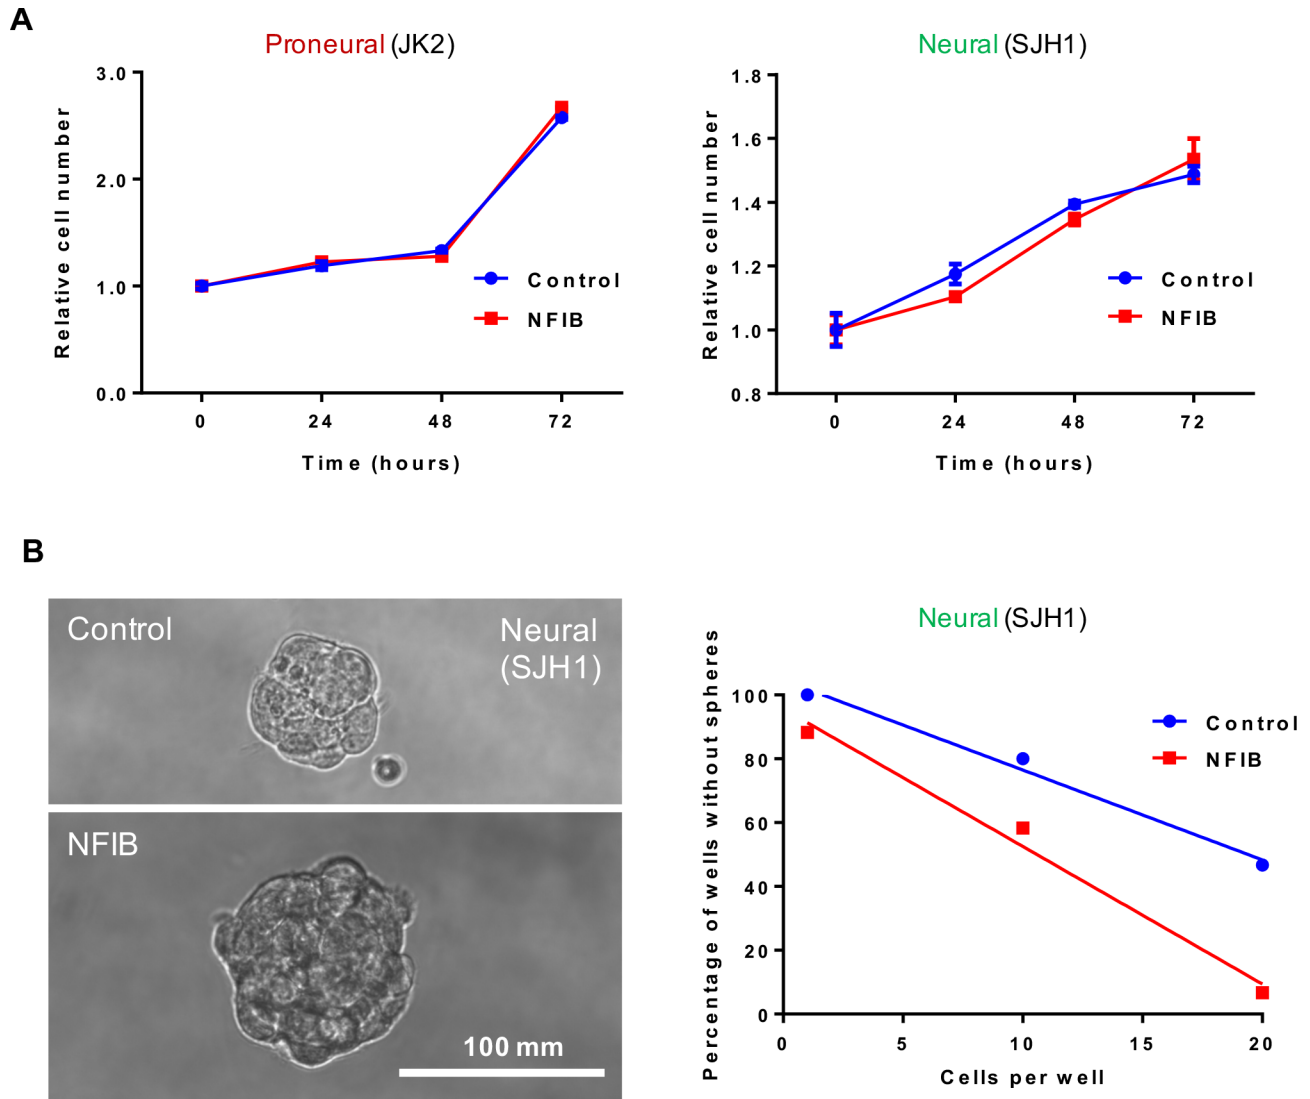

**Supplementary Figure S1: Increased NFIB expression did not alter the proliferation of proneural or neural GBM cell lines although it enhanced tumoursphere formation by neural GBM cells.** (A) Representative MTS assays for proneural (JK2) and neural (SJH1) GBM cell lines expressing NFIB from the ubiquitin C promoter. (B) Both tumoursphere growth and the frequency at which tumourspheres were initiated – both *in vitro* measures of tumourigenicity - were enhanced by increased expression of NFIB in neural (SJH1) GBM cells. Representative tumourspheres (left) and *in vitro* limiting dilution assay (right) for neural (SJH1) GBM cells expressing NFIB from the ubiquitin C promoter versus vector-control cells. Cells were seeded in 96-well plates at 1, 10 or 20 cells per well, in 100  $\mu$ l of serum-free RHB-A medium supplemented with 20 ng/ml EGF and 10 ng/ml FGFb, and tumoursphere growth was recorded after 7 days of culture at 37°C.

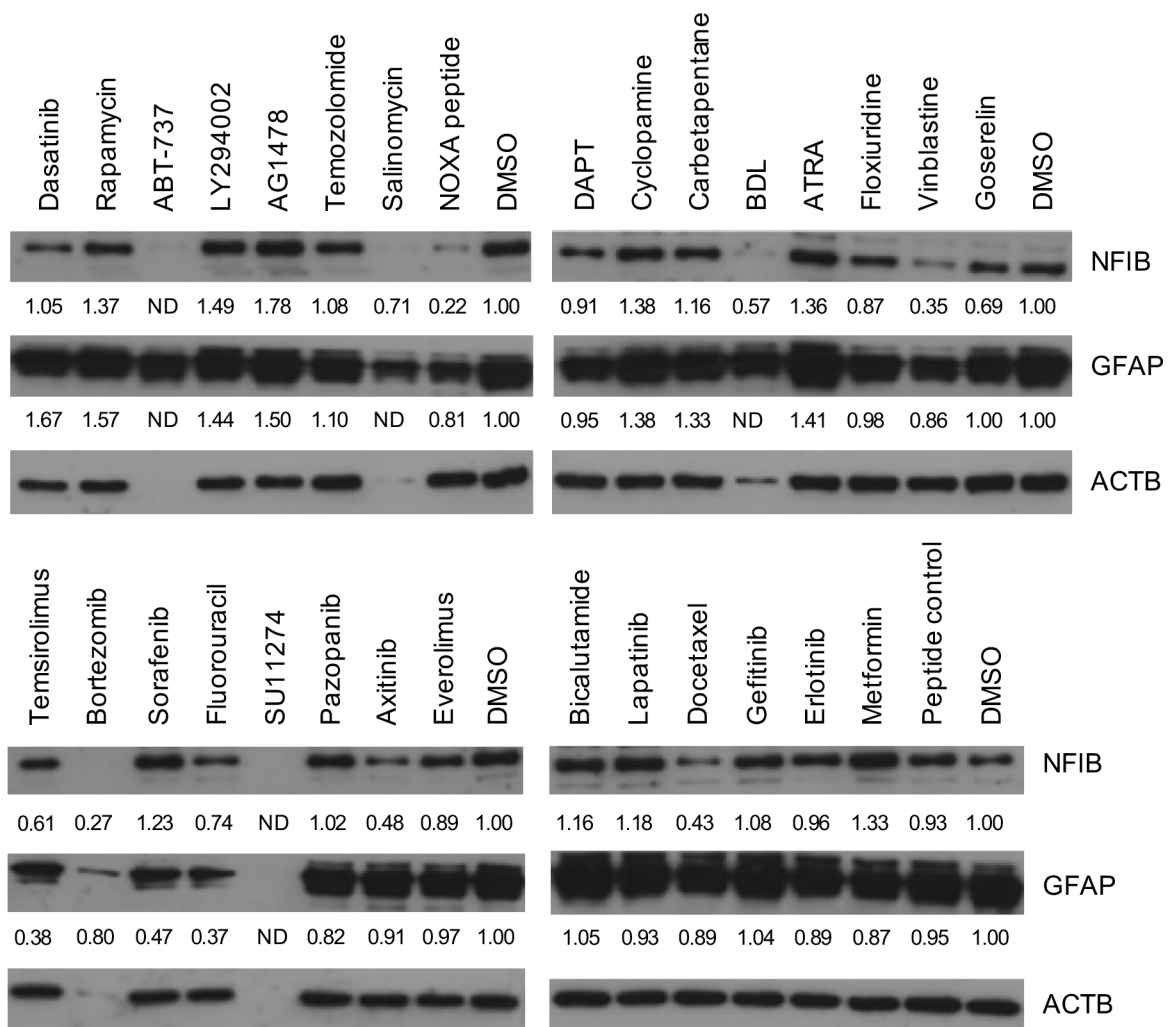

**Supplementary Figure S2: Pilot drug screen for the induction of NFIB expression in the low-passage, unsubtyped GBM cell line Q1.**  $1.5 \times 10^5$  cells were cultured as adherent monolayers, in matrigel-coated 12-well plates in serum-free RHB-A medium supplemented with 20 ng/ml EGF and 10 ng/ml FGFb. Three hours after plating, cells were treated with 10  $\mu$ M drug for 72 hours. Western blots were performed with 30  $\mu$ g of total cell lysate and probed with antibodies against NFIB and the astrocytic differentiation marker GFAP. Numbers below the NFIB and GFAP panels represent the fold-change in western blot signal intensity, measured by densitometry, relative to DMSO-treated control cells and normalised to  $\beta$ -actin expression.
